# Supplementary material for: Caffeic acid phenethyl ester inhibits multispecies biofilm formation and cariogenicity
Source: PeerJ. 2025 Feb 17;13:e18942. doi: 10.7717/peerj.18942 (PMC11841590; doi:10.7717/peerj.18942)
Supplement: Supplemental Information 1 [file peerj-13-18942-s001.xlsx]

## Sheet: S mitis
Growth control	Solvent control	0.8 mg/ml CAPE	1.6 mg/ml CAPE	3.2 mg/ml CAPE	6.4 mg/ml CAPE	CHX
101.22	100	39.67	22.24	4.86	5.06	1.53
83.91	100	53.5	26.71	4.5	4.52	1.29
83.4	100	57.77	21.5	4.58	4.17	1.08

## Sheet: S oralis
Growth control	Solvent control	0.8 mg/ml CAPE	1.6 mg/ml CAPE	3.2 mg/ml CAPE	6.4 mg/ml CAPE	CHX
108.22	100	98.37	43.68	4.46	5.71	0.86
110.07	100	76.27	67.25	5.01	4.07	0.66
110.56	100	78.46	43.97	3.73	3.11	0.86

## Sheet: S mutans
Growth control	Solvent control	0.8 mg/ml CAPE	1.6 mg/ml CAPE	3.2 mg/ml CAPE	6.4 mg/ml CAPE	CHX
108.28	100	80.2	57.42	5.41	4.51	1.02
89.05	100	76.15	54.21	6.89	5.83	1.74
95.98	100	79.23	55.49	6.19	4.45	1.19

## Sheet:  One-way ANOVA of S mitis
Number of families	1
Number of comparisons per family	6
Alpha	0.05
Dunnett's multiple comparisons test	Mean Diff.	95.00% CI of diff.	Significant?	Summary	Adjusted P Value	B-?
Solvent control vs. Growth control	10.49	-2.242 to 23.22	No	ns	0.1258	A	Growth control
Solvent control vs. 0.8 mg/ml CAPE	49.69	36.95 to 62.42	Yes	****	<0.0001	C	0.8 mg/ml CAPE
Solvent control vs. 1.6 mg/ml CAPE	76.52	63.78 to 89.25	Yes	****	<0.0001	D	1.6 mg/ml CAPE
Solvent control vs. 3.2 mg/ml CAPE	95.35	82.62 to 108.1	Yes	****	<0.0001	E	3.2 mg/ml CAPE
Solvent control vs. 6.4 mg/ml CAPE	95.42	82.68 to 108.1	Yes	****	<0.0001	F	6.4 mg/ml CAPE
Solvent control vs. CHX	98.7	85.97 to 111.4	Yes	****	<0.0001	G	CHX
Test details	Mean 1	Mean 2	Mean Diff.	SE of diff.	n1	n2	q	DF
Solvent control vs. Growth control	100	89.51	10.49	4.372	3	3	2.4	14
Solvent control vs. 0.8 mg/ml CAPE	100	50.31	49.69	4.372	3	3	11.37	14
Solvent control vs. 1.6 mg/ml CAPE	100	23.48	76.52	4.372	3	3	17.5	14
Solvent control vs. 3.2 mg/ml CAPE	100	4.647	95.35	4.372	3	3	21.81	14
Solvent control vs. 6.4 mg/ml CAPE	100	4.583	95.42	4.372	3	3	21.83	14
Solvent control vs. CHX	100	1.3	98.7	4.372	3	3	22.58	14

## Sheet:  One-way ANOVA of S oralis
Number of families	1
Number of comparisons per family	6
Alpha	0.05
Dunnett's multiple comparisons test	Mean Diff.	95.00% CI of diff.	Significant?	Summary	Adjusted P Value	B-?
Solvent control vs. Growth control	-9.617	-26.06 to 6.832	No	ns	0.3797	A	Growth control
Solvent control vs. 0.8 mg/ml CAPE	15.63	-0.8148 to 32.08	No	ns	0.0652	C	0.8 mg/ml CAPE
Solvent control vs. 1.6 mg/ml CAPE	48.37	31.92 to 64.81	Yes	****	<0.0001	D	1.6 mg/ml CAPE
Solvent control vs. 3.2 mg/ml CAPE	95.6	79.15 to 112.0	Yes	****	<0.0001	E	3.2 mg/ml CAPE
Solvent control vs. 6.4 mg/ml CAPE	95.7	79.26 to 112.2	Yes	****	<0.0001	F	6.4 mg/ml CAPE
Solvent control vs. CHX	99.21	82.76 to 115.7	Yes	****	<0.0001	G	CHX
Test details	Mean 1	Mean 2	Mean Diff.	SE of diff.	n1	n2	q	DF
Solvent control vs. Growth control	100	109.6	-9.617	5.647	3	3	1.703	14
Solvent control vs. 0.8 mg/ml CAPE	100	84.37	15.63	5.647	3	3	2.768	14
Solvent control vs. 1.6 mg/ml CAPE	100	51.63	48.37	5.647	3	3	8.564	14
Solvent control vs. 3.2 mg/ml CAPE	100	4.4	95.6	5.647	3	3	16.93	14
Solvent control vs. 6.4 mg/ml CAPE	100	4.297	95.7	5.647	3	3	16.95	14
Solvent control vs. CHX	100	0.7933	99.21	5.647	3	3	17.57	14

## Sheet:  One-way ANOVA of S mutans
Number of families	1
Number of comparisons per family	6
Alpha	0.05
Dunnett's multiple comparisons test	Mean Diff.	95.00% CI of diff.	Significant?	Summary	Adjusted P Value	B-?
Solvent control vs. Growth control	2.23	-6.902 to 11.36	No	ns	0.9483	A	Growth control
Solvent control vs. 0.8 mg/ml CAPE	21.47	12.34 to 30.61	Yes	****	<0.0001	C	0.8 mg/ml CAPE
Solvent control vs. 1.6 mg/ml CAPE	44.29	35.16 to 53.43	Yes	****	<0.0001	D	1.6 mg/ml CAPE
Solvent control vs. 3.2 mg/ml CAPE	93.84	84.70 to 103.0	Yes	****	<0.0001	E	3.2 mg/ml CAPE
Solvent control vs. 6.4 mg/ml CAPE	95.07	85.94 to 104.2	Yes	****	<0.0001	F	6.4 mg/ml CAPE
Solvent control vs. CHX	98.68	89.55 to 107.8	Yes	****	<0.0001	G	CHX
Test details	Mean 1	Mean 2	Mean Diff.	SE of diff.	n1	n2	q	DF
Solvent control vs. Growth control	100	97.77	2.23	3.136	3	3	0.7112	14
Solvent control vs. 0.8 mg/ml CAPE	100	78.53	21.47	3.136	3	3	6.848	14
Solvent control vs. 1.6 mg/ml CAPE	100	55.71	44.29	3.136	3	3	14.13	14
Solvent control vs. 3.2 mg/ml CAPE	100	6.163	93.84	3.136	3	3	29.93	14
Solvent control vs. 6.4 mg/ml CAPE	100	4.93	95.07	3.136	3	3	30.32	14
Solvent control vs. CHX	100	1.317	98.68	3.136	3	3	31.47	14

## Sheet: Nonlin fit of IC50,SE mitis
	%inhibition
[Inhibitor] vs. response -- Variable slope (four parameters)
Best-fit values
Bottom	0.03862
Top	97.66
IC50	0.8686
HillSlope	2.345
logIC50	-0.0612
Span	97.62
95% CI (profile likelihood)
Bottom	-3.019 to 3.097
Top	94.72 to 101.0
IC50	0.8159 to 0.9252
HillSlope	1.971 to 2.775
logIC50	-0.08838 to -0.03376
Goodness of Fit
Degrees of Freedom	6
R squared	0.9986
Sum of Squares	18.72
Sy.x	1.767
Constraints
IC50	IC50 > 0
Number of points
# of X values	10
# Y values analyzed	10

## Sheet: Nonlin fit of IC50,SE oralis
	%inhibition
[Inhibitor] vs. response -- Variable slope (four parameters)
Best-fit values
Bottom	1.126
Top	100.5
IC50	1.393
HillSlope	2.603
logIC50	0.1439
Span	99.37
95% CI (profile likelihood)
Bottom	-7.181 to 9.489
Top	92.62 to 110.8
IC50	1.187 to 1.636
HillSlope	1.835 to 3.850
logIC50	0.07442 to 0.2137
Goodness of Fit
Degrees of Freedom	6
R squared	0.991
Sum of Squares	132.6
Sy.x	4.701
Constraints
IC50	IC50 > 0
Number of points
# of X values	10
# Y values analyzed	10

## Sheet: Nonlin fit of IC50,SE mutans
	%inhibition
[Inhibitor] vs. response -- Variable slope (four parameters)
Best-fit values
Bottom	3.417
Top	102.4
IC50	1.664
HillSlope	2.849
logIC50	0.2212
Span	99.01
95% CI (profile likelihood)
Bottom	-9.008 to 15.59
Top	90.72 to 121.4
IC50	1.330 to 2.073
HillSlope	1.601 to ???
logIC50	0.1239 to 0.3167
Goodness of Fit
Degrees of Freedom	6
R squared	0.9829
Sum of Squares	261.3
Sy.x	6.599
Constraints
IC50	IC50 > 0
Number of points
# of X values	10
# Y values analyzed	10
