# Supplementary material for: Caffeic acid phenethyl ester inhibits multispecies biofilm formation and cariogenicity
Source: PeerJ. 2025 Feb 17;13:e18942. doi: 10.7717/peerj.18942 (PMC11841590; doi:10.7717/peerj.18942)
Supplement: Supplemental Information 2 [file peerj-13-18942-s002.xlsx]

## Sheet: Biofilm formation assay
Growth control	Solvent control	0.8 mg/ml CAPE	1.6 mg/ml CAPE	3.2 mg/ml CAPE	CHX
117.55	100	67.94	10.62	0.43	1.3
97.97	100	73.1	23.64	0.53	0
91.54	100	70.77	11.4	0.67	0.22

## Sheet: Ordinary one-way ANOVA 
Number of families	1
Number of comparisons per family	5
Alpha	0.05
Dunnett's multiple comparisons test	Mean Diff.	95.00% CI of diff.	Significant?	Summary	Adjusted P Value	B-?
Solvent control vs. Growth control	-2.667	-11.65 to 6.321	No	ns	0.8544	A	Growth control
Solvent control vs. CAPE 0.8 mg/ml	-29.33	-38.32 to -20.35	Yes	****	<0.0001	C	CAPE 0.8 mg/ml
Solvent control vs. CAPE 1.6 mg/ml	-84.79	-93.78 to -75.81	Yes	****	<0.0001	D	CAPE 1.6 mg/ml
Solvent control vs. CAPE 3.2 mg/ml	-99.19	-108.2 to -90.20	Yes	****	<0.0001	E	CAPE 3.2 mg/ml
Solvent control vs. CHX 50 µg/ml	-99.57	-108.6 to -90.58	Yes	****	<0.0001	F	CHX 50 µg/ml
Test details	Mean 1	Mean 2	Mean Diff.	SE of diff.	n1	n2	q	DF
Solvent control vs. Growth control	0	2.667	-2.667	3.098	3	3	0.8608	12
Solvent control vs. CAPE 0.8 mg/ml	0	29.33	-29.33	3.098	3	3	9.469	12
Solvent control vs. CAPE 1.6 mg/ml	0	84.79	-84.79	3.098	3	3	27.37	12
Solvent control vs. CAPE 3.2 mg/ml	0	99.19	-99.19	3.098	3	3	32.02	12
Solvent control vs. CHX 50 µg/ml	0	99.57	-99.57	3.098	3	3	32.14	12
