# Supplementary material for: Caffeic acid phenethyl ester inhibits multispecies biofilm formation and cariogenicity
Source: PeerJ. 2025 Feb 17;13:e18942. doi: 10.7717/peerj.18942 (PMC11841590; doi:10.7717/peerj.18942)
Supplement: Supplemental Information 3 [file peerj-13-18942-s003.xlsx]

## Sheet: OD 490 nm-individual
S. mitis	S. oralis	S. mutans	Mixed species
0	1.27	0.41*	1.59
0.21*	1.61	0.86	1.18*
0.07	0.7*	0.62	2.51*
		0.61	1.75

## Sheet: Descriptive statistics of OD 49
	S. mitis	S. oralis	S. mutans	Mixed species
Number of values	2	2	3	2
Mean	0.035	1.44	0.6967	1.67
Std. Deviation	0.0495	0.2404	0.1415	0.1131
Std. Error of Mean	0.035	0.17	0.08172	0.08

## Sheet: % activity-S mutans
Control	0.8	1.6	3.2
100	41.9156	28.63452*	21.73019*
100	55.3793	43.2538	47.6092
100	69.43952*	53.5883	48.7429

## Sheet: % activity-S oralis
Control	0.8	1.6	3.2
100	49.0819	42.9144	101.26
100	38.9587	34.0633	80.3747
100	48.3001	75.572	91.1206

## Sheet: % activity-mixed
Control	0.8	1.6	3.2
100	56.73	57.65	25.76
100	48	37.54*	17.21*
100	105.85*	64.81	53.28
100	73.56	42.79	51.18

## Sheet: one-way ANOVA of oralis
Number of families	1
Number of comparisons per family	3
Alpha	0.05
Dunnett's multiple comparisons test	Mean Diff.	95.00% CI of diff.	Significant?	Summary	Adjusted P Value	A-?
Control vs. 0.8	54.55	25.31 to 83.80	Yes	**	0.0017	B	0.8
Control vs. 1.6	49.15	19.91 to 78.39	Yes	**	0.0033	C	1.6
Control vs. 3.2	9.082	-20.16 to 38.33	No	ns	0.7102	D	3.2
Test details	Mean 1	Mean 2	Mean Diff.	SE of diff.	n1	n2	q	DF
Control vs. 0.8	100	45.45	54.55	10.16	3	3	5.372	8
Control vs. 1.6	100	50.85	49.15	10.16	3	3	4.84	8
Control vs. 3.2	100	90.92	9.082	10.16	3	3	0.8943	8

## Sheet: one-way ANOVA of mutans
Number of families	1
Number of comparisons per family	3
Alpha	0.05
Dunnett's multiple comparisons test	Mean Diff.	95.00% CI of diff.	Significant?	Summary	Adjusted P Value	A-?
Control vs. 0.8	51.35	34.99 to 67.72	Yes	***	0.0004	B	0.8
Control vs. 1.6	51.58	35.21 to 67.94	Yes	***	0.0003	C	1.6
Control vs. 3.2	51.82	35.46 to 68.19	Yes	***	0.0003	D	3.2
Test details	Mean 1	Mean 2	Mean Diff.	SE of diff.	n1	n2	q	DF
Control vs. 0.8	100	48.65	51.35	4.911	3	2	10.46	5
Control vs. 1.6	100	48.42	51.58	4.911	3	2	10.5	5
Control vs. 3.2	100	48.18	51.82	4.911	3	2	10.55	5

## Sheet: one-way ANOVA of mixed
Number of families	1
Number of comparisons per family	3
Alpha	0.05
Dunnett's multiple comparisons test	Mean Diff.	95.00% CI of diff.	Significant?	Summary	Adjusted P Value	A-?
Control vs. 0.8	40.57	17.10 to 64.04	Yes	**	0.0023	B	0.8
Control vs. 1.6	44.92	21.45 to 68.39	Yes	**	0.0011	C	1.6
Control vs. 3.2	56.59	33.12 to 80.06	Yes	***	0.0002	D	3.2
Test details	Mean 1	Mean 2	Mean Diff.	SE of diff.	n1	n2	q	DF
Control vs. 0.8	100	59.43	40.57	8.286	4	3	4.896	9
Control vs. 1.6	100	55.08	44.92	8.286	4	3	5.421	9
Control vs. 3.2	100	43.41	56.59	8.286	4	3	6.83	9
