# Supplementary material for: Caffeic acid phenethyl ester inhibits multispecies biofilm formation and cariogenicity
Source: PeerJ. 2025 Feb 17;13:e18942. doi: 10.7717/peerj.18942 (PMC11841590; doi:10.7717/peerj.18942)
Supplement: Supplemental Information 4 [file peerj-13-18942-s004.xlsx]

## Sheet: Real time PCR
	Solvent control	Solvent control	CAPE	CAPE
gtfB	1	1	0.37	0.61
ldh	1	1	0.34	0.4
gbpB	1	1	0.6	0.51
brpA	1	1	0.45	0.47
luxS	1	1	0.25	0.6
spaP	1	1	1.27	1.91

## Sheet: Unpaired t test-gtfb
Table Analyzed	gtfB expression-1.6 mg/ml
Column B	1.6 mg/ml CAPE
vs.	vs.
Column A	Solvent control
Unpaired t test
P value	0.0256
P value summary	*
Significantly different (P < 0.05)?	Yes
One- or two-tailed P value?	One-tailed
t	df	t=4.250	df=2
How big is the difference?
Mean of column A	1
Mean of column B	0.49
Difference between means (B - A) ± SEM	-0.5100 ± 0.1200
95% confidence interval	-1.026 to 0.006318
R squared (eta squared)	0.9003
F test to compare variances
F	DFn	Dfd
P value
P value summary
Significantly different (P < 0.05)?
Data analyzed
Sample size	column A	2
Sample size	column B	2

## Sheet: Unpaired t test-ldh
Table Analyzed	ldh expression-1.6 mg/ml
Column B	1.6 mg/ml CAPE
vs.	vs.
Column A	Solvent control
Unpaired t test
P value	0.0105
P value summary	*
Significantly different (P < 0.05)?	Yes
One- or two-tailed P value?	One-tailed
t	df	t=3.694	df=4
How big is the difference?
Mean of column A	1
Mean of column B	0.5033
Difference between means (B - A) ± SEM	-0.4967 ± 0.1345
95% confidence interval	-0.8700 to -0.1234
R squared (eta squared)	0.7733
F test to compare variances
F	DFn	Dfd	Infinity	2	2
P value	<0.0001
P value summary	****
Significantly different (P < 0.05)?	Yes
Data analyzed
Sample size	column A	3
Sample size	column B	3

## Sheet: Unpaired t test-gbpb
Table Analyzed	gbpB expression-1.6 mg/ml
Column B	1.6 mg/ml CAPE
vs.	vs.
Column A	Solvent control
Unpaired t test
P value	0.0019
P value summary	**
Significantly different (P < 0.05)?	Yes
One- or two-tailed P value?	One-tailed
t	df	t=6.055	df=4
How big is the difference?
Mean of column A	1
Mean of column B	0.6133
Difference between means (B - A) ± SEM	-0.3867 ± 0.06386
95% confidence interval	-0.5640 to -0.2094
R squared (eta squared)	0.9016
F test to compare variances
F	DFn	Dfd	Infinity	2	2
P value	<0.0001
P value summary	****
Significantly different (P < 0.05)?	Yes
Data analyzed
Sample size	column A	3
Sample size	column B	3

## Sheet: Unpaired t test-brpa
Table Analyzed	brpA expression-1.6 mg/ml
Column B	1.6 mg/ml CAPE
vs.	vs.
Column A	Solvent control
Unpaired t test
P value	0.0002
P value summary	***
Significantly different (P < 0.05)?	Yes
One- or two-tailed P value?	One-tailed
t	df	t=54.00	df=2
How big is the difference?
Mean of column A	1
Mean of column B	0.46
Difference between means (B - A) ± SEM	-0.5400 ± 0.01000
95% confidence interval	-0.5830 to -0.4970
R squared (eta squared)	0.9993
F test to compare variances
F	DFn	Dfd
P value
P value summary
Significantly different (P < 0.05)?
Data analyzed
Sample size	column A	2
Sample size	column B	2

## Sheet: Unpaired t test-luxs
Table Analyzed	luxS expression-1.6 mg/ml
Column B	1.6 mg/ml CAPE
vs.	vs.
Column A	Solvent control
Unpaired t test
P value	0.0407
P value summary	*
Significantly different (P < 0.05)?	Yes
One- or two-tailed P value?	One-tailed
t	df	t=3.286	df=2
How big is the difference?
Mean of column A	1
Mean of column B	0.425
Difference between means (B - A) ± SEM	-0.5750 ± 0.1750
95% confidence interval	-1.328 to 0.1780
R squared (eta squared)	0.8437
F test to compare variances
F	DFn	Dfd
P value
P value summary
Significantly different (P < 0.05)?
Data analyzed
Sample size	column A	2
Sample size	column B	2

## Sheet: Unpaired t test-spap
Table Analyzed	spaP expression-1.6 mg/ml
Column B	1.6 mg/ml CAPE
vs.	vs.
Column A	Solvent control
Unpaired t test
P value	0.1033
P value summary	ns
Significantly different (P < 0.05)?	No
One- or two-tailed P value?	One-tailed
t	df	t=1.844	df=2
How big is the difference?
Mean of column A	1
Mean of column B	1.59
Difference between means (B - A) ± SEM	0.5900 ± 0.3200
95% confidence interval	-0.7868 to 1.967
R squared (eta squared)	0.6296
F test to compare variances
F	DFn	Dfd
P value
P value summary
Significantly different (P < 0.05)?
Data analyzed
Sample size	column A	2
Sample size	column B	2
