# Supplementary material for: Caffeic acid phenethyl ester inhibits multispecies biofilm formation and cariogenicity
Source: PeerJ. 2025 Feb 17;13:e18942. doi: 10.7717/peerj.18942 (PMC11841590; doi:10.7717/peerj.18942)
Supplement: Supplemental Information 5 [file peerj-13-18942-s005.xlsx]

## Sheet: intensity
Solvent control	0.8 mg/ml CAPE	1.6 mg/ml CAPE	CHX
2.27	0.31	0.45	0.4
2.65	0.28	0.79
2.41	0.28

## Sheet: biofilm thickness
Solvent control	0.8 mg/ml CAPE	1.6 mg/ml CAPE	CHX
15.6	15	12	6.6
13.8	15.6	9.6
15	15.6

## Sheet: one-way ANOVA intensity
Number of families	1
Number of comparisons per family	3
Alpha	0.05
Dunnett's multiple comparisons test	Mean Diff.	95.00% CI of diff.	Significant?	Summary	Adjusted P Value	A-?
Solvent control vs. 0.8 mg/ml CAPE	2.153	1.710 to 2.597	Yes	****	<0.0001	B	0.8 mg/ml CAPE
Solvent control vs. 1.6 mg/ml CAPE	1.823	1.327 to 2.319	Yes	***	0.0002	C	1.6 mg/ml CAPE
Solvent control vs. CHX	2.043	1.416 to 2.671	Yes	***	0.0003	D	CHX
Test details	Mean 1	Mean 2	Mean Diff.	SE of diff.	n1	n2	q	DF
Solvent control vs. 0.8 mg/ml CAPE	2.443	0.29	2.153	0.1328	3	3	16.21	5
Solvent control vs. 1.6 mg/ml CAPE	2.443	0.62	1.823	0.1485	3	2	12.28	5
Solvent control vs. CHX	2.443	0.4	2.043	0.1878	3	1	10.88	5

## Sheet: one-way ANOVA thickness
Number of families	1
Number of comparisons per family	3
Alpha	0.05
Dunnett's multiple comparisons test	Mean Diff.	95.00% CI of diff.	Significant?	Summary	Adjusted P Value	A-?
Solvent control vs. 0.8 mg/ml CAPE	-0.6	-3.272 to 2.072	No	ns	0.816	B	0.8 mg/ml CAPE
Solvent control vs. 1.6 mg/ml CAPE	4	1.013 to 6.987	Yes	*	0.0163	C	1.6 mg/ml CAPE
Solvent control vs. CHX	8.2	4.421 to 11.98	Yes	**	0.002	D	CHX
Test details	Mean 1	Mean 2	Mean Diff.	SE of diff.	n1	n2	q	DF
Solvent control vs. 0.8 mg/ml CAPE	14.8	15.4	-0.6	0.8	3	3	0.75	5
Solvent control vs. 1.6 mg/ml CAPE	14.8	10.8	4	0.8944	3	2	4.472	5
Solvent control vs. CHX	14.8	6.6	8.2	1.131	3	1	7.248	5
