# Supplementary material for: Caffeic acid phenethyl ester inhibits multispecies biofilm formation and cariogenicity
Source: PeerJ. 2025 Feb 17;13:e18942. doi: 10.7717/peerj.18942 (PMC11841590; doi:10.7717/peerj.18942)
Supplement: Supplemental Information 6 [file peerj-13-18942-s006.xls]

## Sheet: Sheet1
ITEM TO CHECK	IMPORTANCE	CHECKLIST
EXPERIMENTAL DESIGN
Definition of experimental and control groups	E	Page 4-5, line 123-124
Number within each group	E	Page 5, line 149
Assay carried out by core lab or investigator's lab?	D	No
Acknowledgement of authors' contributions	D	No
SAMPLE
Description	E	Page 4-5, line 122-124
Volume/mass of sample processed	D	No
Microdissection or macrodissection	E	Not applicable
Processing procedure	E	Not applicable
If frozen - how and how quickly?	E	Not applicable
If fixed - with what, how quickly?	E	Not applicable
Sample storage conditions and duration (especially for FFPE samples)	E	Not applicable
NUCLEIC ACID EXTRACTION
Procedure and/or instrumentation	E	Page 5, line 124-125
Name of kit and details of any modifications	E	Page 5, line 124-125
Source of additional reagents used	D	Not applicable
Details of DNase or RNAse treatment	E	Page 5, line 127-128
Contamination assessment (DNA or RNA)	E	Page 5, line 125-127
Nucleic acid quantification	E	Page 5, line 125-127
Instrument and method	E	Page 5, line 125-127
Purity (A260/A280)	D	Page 5, line 125-127
Yield	D	No
RNA integrity method/instrument	E	Not applicable
RIN/RQI or Cq of 3' and 5' transcripts	E	Not applicable
Electrophoresis traces	D	Not applicable
Inhibition testing (Cq dilutions, spike or other)	E	Not applicable
REVERSE TRANSCRIPTION
Complete reaction conditions	E	Page 5, line 127-128
Amount of RNA and reaction volume	E	Page 5, line 127-130
Priming oligonucleotide (if using GSP) and concentration	E	Not applicable
Reverse transcriptase and concentration	E	Page 5, line 128-131
Temperature and time	E	Page 5, line 128-131
Manufacturer of reagents and catalogue numbers	D	Page 5, line 127-128
Cqs with and without RT	D*	Not applicable
Storage conditions of cDNA	D	Page 5, line 132
qPCR TARGET INFORMATION
If multiplex, efficiency and LOD of each assay.	E	Not applicable
Sequence accession number	E	Table1
Location of amplicon	D	No
Amplicon length	E	Table1
In silico specificity screen (BLAST, etc)	E	Not applicable
Pseudogenes, retropseudogenes or other homologs?	D	Not applicable
Sequence alignment	D	Not applicable
Secondary structure analysis of amplicon	D	Not applicable
Location of each primer by exon or intron (if applicable)	E	Not applicable
What splice variants are targeted?	E	Not applicable
qPCR OLIGONUCLEOTIDES
Primer sequences	E	Table1
RTPrimerDB Identification Number	D	Not applicable
Probe sequences	D**	Not applicable
Location and identity of any modifications	E	Not applicable
Manufacturer of oligonucleotides	D	No
Purification method	D	No
qPCR PROTOCOL
Complete reaction conditions	E	Page 5, line 142-144
Reaction volume and amount of cDNA/DNA	E	Page 5, line 142-144
Primer, (probe), Mg++ and dNTP concentrations	E	Page 5, line 143
Polymerase identity and concentration	E	Page 5, line 143-144
Buffer/kit identity and manufacturer	E	Page 5, line 143-144
Exact chemical constitution of the buffer	D	No
Additives (SYBR Green I, DMSO, etc.)	E	Page 5, line 143-144
Manufacturer of plates/tubes and catalog number	D	No
Complete thermocycling parameters	E	Page 5, line 146-149
Reaction setup (manual/robotic)	D	No
Manufacturer of qPCR instrument	E	Page 5, line 145
qPCR VALIDATION
Evidence of optimisation (from gradients)	D	No
Specificity (gel, sequence, melt, or digest)	E	Page 5, line 138-140
For SYBR Green I, Cq of the NTC	E	Page 5, line 138-140
Standard curves with slope and y-intercept	E	Not applicable
PCR efficiency calculated from slope	E	Not applicable
Confidence interval for PCR efficiency or standard error	D	Not applicable
r2 of standard curve	E	Not applicable
Linear dynamic range	E	Not applicable
Cq variation at lower limit	E	Not applicable
Confidence intervals throughout range	D	Not applicable
Evidence for limit of detection	E	No
If multiplex, efficiency and LOD of each assay.	E	Not applicable
DATA ANALYSIS
qPCR analysis program (source, version)	E	Page 5, line 150
Cq method determination	E	Page 5, line 150
Outlier identification and disposition	E	No
Results of NTCs	E	No
Justification of number and choice of reference genes	E	Page 5, line 150-154
Description of normalisation method	E	Page 5, line 150-154
Number and concordance of biological replicates	D	Page 5, line 150-154
Number and stage (RT or qPCR) of technical replicates	E	No
Repeatability (intra-assay variation)	E	No
Reproducibility (inter-assay variation, %CV)	D	No
Power analysis	D	No
Statistical methods for result significance	E	Page 7, line 194-198
Software (source, version)	E	Page 7, line 197-198
Cq or raw data submission using RDML	D	No
Table 1. MIQE checklist for authors, reviewers and editors. All essential information (E) must be submitted with the manuscript. Desirable
information (D) should be submitted if available. If using primers obtained from RTPrimerDB, information on qPCR target, oligonucleotides,
protocols and validation is available from that source.
*: Assessing the absence of DNA using a no RT assay is essential when first extracting RNA. Once the sample has been validated as
RDNA-free, inclusion of a no-RT control is desirable, but no longer essential.
**: Disclosure of the probe sequence is highly desirable and strongly encouraged. However, since not all commercial pre-designed assay
vendors provide this information, it cannot be an essential requirement. Use of such assays is advised against.
